# Supplementary material for: Enhanced catalytic performance of CO methanation over VOx assisted Ni/MCF catalyst
Source: Royal Society of Chemistry journal article supplement (doi:10.1039/d0se00052c), 2020-01-01
Supplement: d0se00052c1.pdf [file d0se00052c1.pdf]

## Supporting Information

### Enhanced Catalytic Performance of CO Methanation over VO<sub>x</sub> Assisted Ni/MCF Catalyst

Zhiwei Tian<sup>[a]</sup>, Qing Liu\*<sup>[a]</sup>, Bing Bian<sup>[a,b]</sup>

<sup>[a]</sup>*Key Laboratory of Low Carbon Energy and Chemical Engineering, College of Chemical and Environmental Engineering, Shandong University of Science and Technology, Qingdao Shandong 266590, China*

<sup>[b]</sup>*College of Chemical Engineering, Qingdao University of Science and Technology, Qingdao 266042, Shandong, China*

\*Corresponding author. *E-mail address:* sdsslq@163.com (Q. Liu).

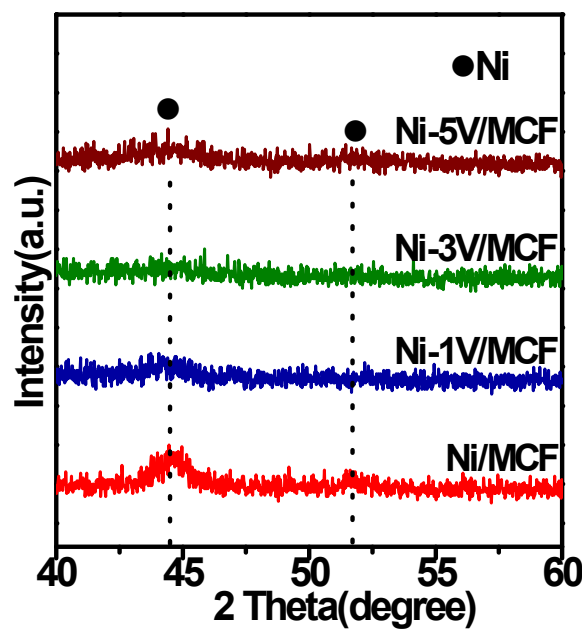

Fig. S1 XRD patterns of the reduced catalysts.

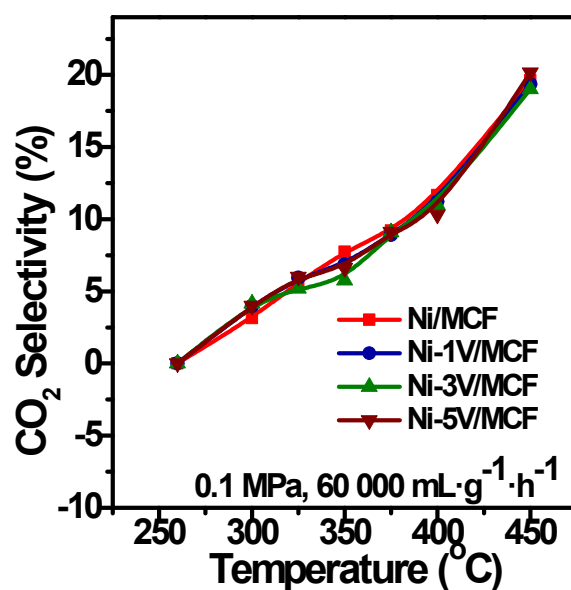

Fig. S2 CO<sub>2</sub> selectivity of the different catalysts.
